# Supplementary material for: Superhydrophobic MOF/polymer composite with hierarchical porosity for boosting catalytic performance in an humid environment
Source: Royal Society of Chemistry journal article supplement (doi:10.1039/d4nr00948g), 2024-01-01
Supplement: d4nr00948g1.pdf [file d4nr00948g1.pdf]

## *Electronic Supplementary Information (ESI)*

### **Superhydrophobic MOF/Polymer Composite with Hierarchical Porosity for Boosting Catalytic Performance in Humid Environment**

*Ming-Liang Gao,<sup>a,b‡</sup> Shuo Liu,<sup>a‡</sup> Lin Liu,<sup>a\*</sup> and Zheng-Bo Han<sup>a\*</sup>*

<sup>a</sup> College of Chemistry, Liaoning University, Shenyang 110036, P. R. China

<sup>b</sup> Department of Chemistry, University of Science and Technology of China, Hefei, Anhui 230026, P. R. China;

\*E-mail: ceshzb@lnu.edu.cn; liulin@lnu.edu.cn.

‡ These authors contributed equally to this work.

## 1. Experimental Section/Methods

### 1.1 General Information

All chemicals were purchased from commercial sources and used without further purification. PXRD patterns were remeasured on a Japan Rigaku Miniflex 600 rotation anode X-ray diffractometer equipped with graphite-monochromatized Cu K $\alpha$  radiation ( $\lambda = 1.54 \text{ \AA}$ ) and setting the  $0.03^\circ$  of step sizes in the  $2\theta$  range of 5 to  $40^\circ$ . Fourier transform infrared (FT-IR) spectra of samples were recorded at room temperature and performed on a PerkinElmer. The average spectra were scanned sixteen times in the range of 4000-400  $\text{cm}^{-1}$ . Raman spectra were obtained using a Renishaw Confocal micro-Raman Spectrometer equipped with a HeNe (633 nm) laser operating at 10% power. The size and morphology details of the materials were determined by scanning electron microscope (SEM) Hitachi 3030 equipped with an energy dispersive X-ray detector (EDX). Transmission electron microscope (TEM) and selected-area electron diffraction (SAED) images of the typical samples were captured with Carl Zeiss Libra 200. Thermogravimetric (TG) analysis was performed on a PerkinElmer/Pyris1 machine in the temperature range of room temperature to  $750 \text{ }^\circ\text{C}$  at  $5 \text{ }^\circ\text{C min}^{-1}$  under  $\text{N}_2$  atmosphere. Wetting properties of as-prepared samples were characterized by obtaining their contact angles with liquid water using Biolin Attension Theta. Nitrogen adsorption isotherm measurements were measured using 3H-2000PS1 analyzer (Beishide Instrument Co., China) at 77 K to determine the surface area of the samples and the pore size distribution was calculated using NLDFT models. The products of Friedel-Crafts alkylation reaction were monitored by  $^1\text{H}$  NMR spectra recorded on a Varian-300 MHz NMR spectrometer.

### 1.2 Catalyst Preparation

**1.2.1 Preparation of ZIF-8.** The synthetic process of ZIF-8 was according to the previous literature with a little modification.<sup>S1</sup> Typically,  $\text{Zn}(\text{NO}_3)_2 \cdot 6\text{H}_2\text{O}$  (0.5 mmol) of was dissolved in 350 mmol of MeOH to form A solution. 4 mmol of 2-Mim with another 350 mmol MeOH was mixed to form B solution. Later, B solution was added into the A solution and vigorously stirred for 24 h. The resulted ZIF-8 particles were separated by centrifugation at 14000 rpm for 10 min and washed with MeOH several times. The obtained ZIF-8 powder was dried in vacuum at  $60 \text{ }^\circ\text{C}$  for 24 h.

**1.2.2 Preparation of PDVB-vim.** In a typical synthesis, 30 mmol of divinylbenzene (DVB) and 10 mmol of 1-vinylimidazole (vim) were added to a solution containing 0.85 mmol of

azodiisobutyronitrile (AIBN) and 30 mL of ethyl acetate. The formed clear solution was stirring at room temperature for 3 h, the mixture was hydrothermally treated at 100 °C for 24 h, followed by slow evaporation of the solvent at room temperature for 2 days. The obtained solid block material was washed with ethyl acetate and MeOH several times, respectively. The resulted PDVB-vim was dried overnight at 75 °C.<sup>S2</sup>

**1.2.3 Preparation of ZIF-8/PDVB-vim composite.** A certain amount of PDVB-vim was dispersed in 350 mmol MeOH and then 4 mmol of 2-Mim was added for ultrasonic treatment for 60 min. A solution consisting of 0.5 mmol of  $Zn(NO_3)_2 \cdot 6H_2O$  and 350 mmol of MeOH was added into the above solution and vigorously stirred for 24 h. The ZIF-8/PDVB-vim composite was separated from the milky dispersion by centrifugation and washing with fresh MeOH. This procedure was repeated twice and dried at 60 °C in air.

**1.2.4 UV-Vis Spectroscopy Test.** To investigate its adsorption properties, 10 mg of ZIF-8/PDVB-vim composite was well dispersed in MeCN (5 mL) and placed in a centrifuge tube by stirring for 30 minutes. To the stable suspension of samples, a freshly prepared trans- $\beta$ -nitrostyrene or indole solution (1 mL, 1 mM in MeCN) was added.

### **1.3 Catalytic Performance Evaluation.**

The liquid-phase Friedel-Crafts reaction between aromatic compounds and electron-deficient alkenes including indole and trans- $\beta$ -nitrostyrene was performed in a 10 mL Synthware glass equipped a condenser-west tube. The reaction tests were carried out at room temperature under atmosphere for 24 h. Typically, indole (180 mg, 1.5 mmol), trans- $\beta$ -nitrostyrene (150 mg, 1.0 mmol), and catalyst 5 mol% based on Zn(II) center were added to 5 mL of  $CH_3CN$ . Reaction mixtures solvent was evaporated under vacuum and the obtained dry product was monitored by <sup>1</sup>H NMR spectroscopy. After reaction, the catalyst was separated by centrifugation, washed with MeOH several times, dried under vacuum and then reused for the next run of the reaction as described above.

### **1.4 Oil-Water Separation and Recyclability Experiments.**

The gravity-assisted oil–water separation method was used. After ZIF-8/PDVB-vim composite was fixed in a glass funnel, a blend of chloroform (100 mL) and dyed water (with methylene blue, 100 mL) was poured from the funnel top. Collecting the chloroform and dyed water that had been separated came from the top and bottom funnel, respectively.

The separation efficiency (%) was then calculated:

$$\text{Separation efficiency (\%)} = V_{\text{terminative}}/V_{\text{original}} \times 100\%$$

where the volumes of chloroform before and after separation experiments are denoted by  $V_{\text{original}}$  and  $V_{\text{terminative}}$ , respectively. The cycling performance of super-hydrophobic filter paper fixed with ZIF-8/PDVB-vim composite was evaluated by performing 30 replicate experiments of chloroform and dyed water separation.

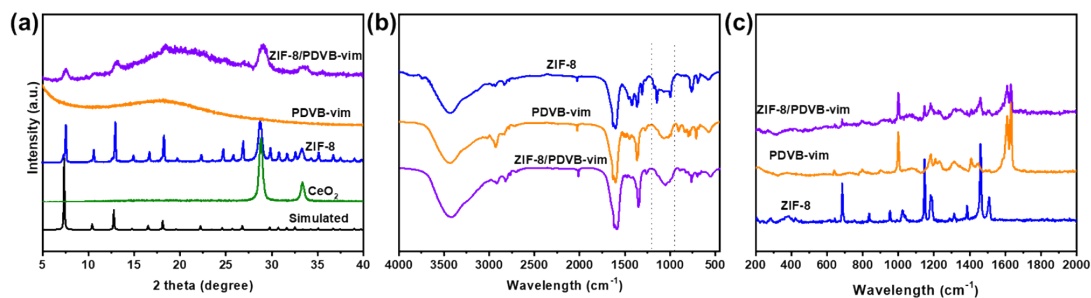

**Fig. S1** (a) the PXRD patterns, (b) FT-IR spectra and (c) Raman spectra of ZIF-8, PDVB-vim and ZIF-8/PDVB-vim composite (nano CeO<sub>2</sub> as an internal standard).

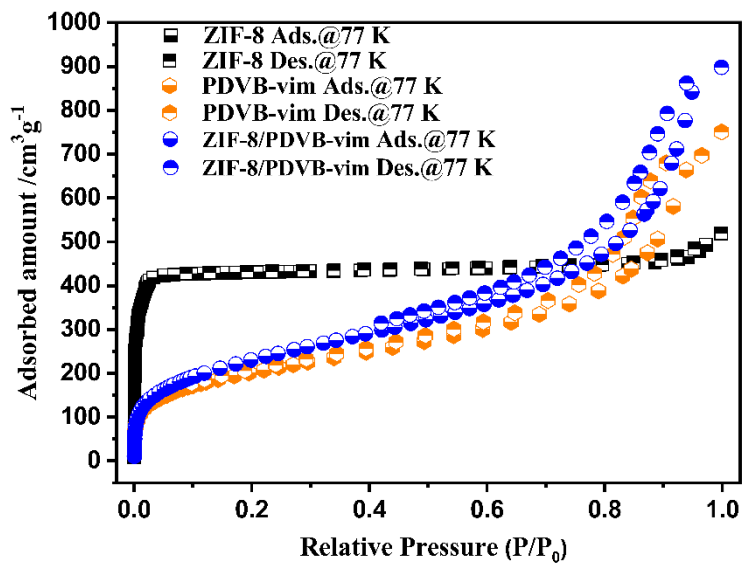

**Fig. S2** N<sub>2</sub> adsorption isotherm of ZIF-8, PDVB-vim and ZIF-8/PDVB-vim composite.

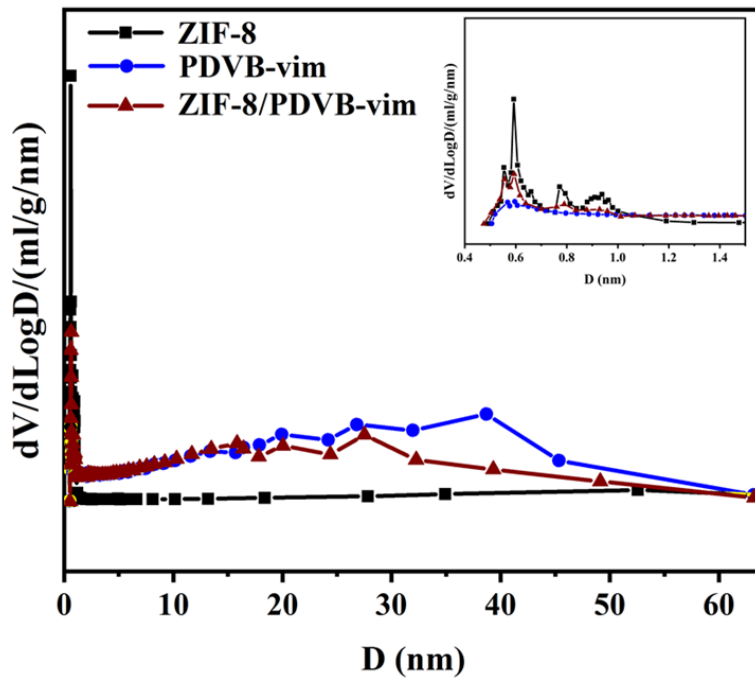

**Fig. S3** The pore size distributions based on NLDFT models of ZIF-8, PDVB-vim and ZIF-8/PDVB-vim composite.

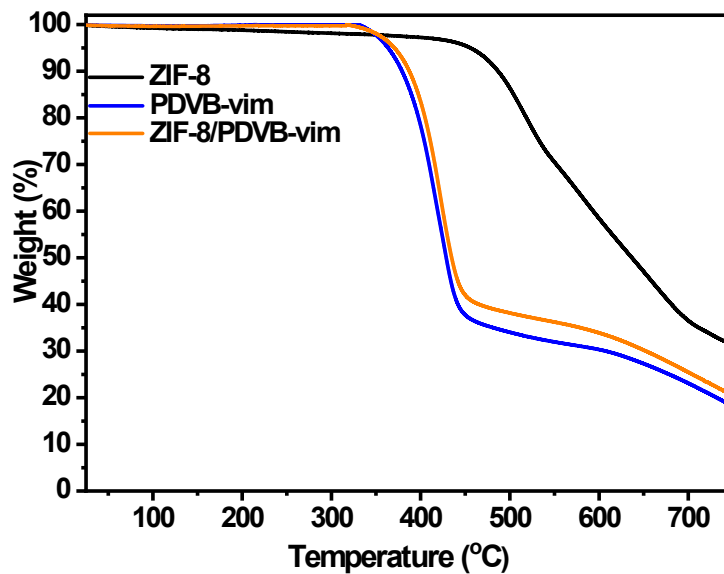

**Fig. S4** Thermogravimetric analyses (TGA) of ZIF-8, PDVB-vim and ZIF-8/PDVB-vim composite.

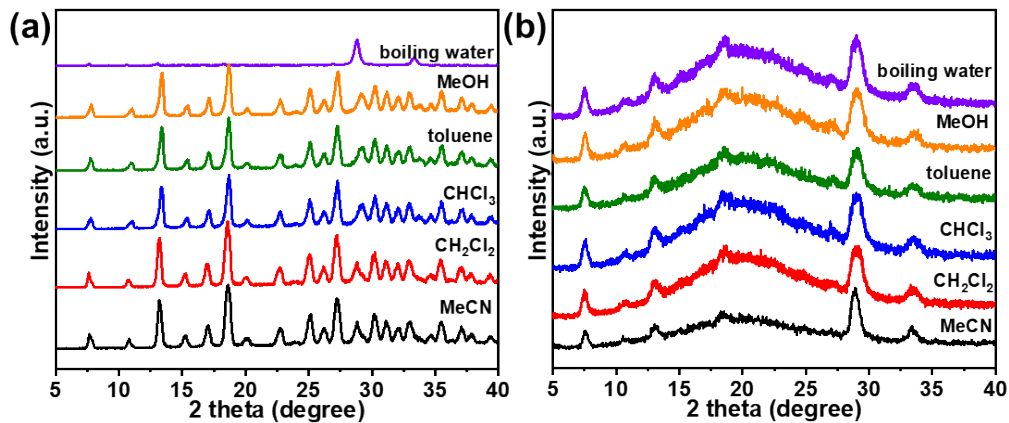

**Fig. S5** The chemical stability of ZIF-8 and ZIF-8/PDVB-vim composite immersed in MeOH, CH<sub>2</sub>Cl<sub>2</sub>, CHCl<sub>3</sub>, Toluene, MeCN, even in boiling water for 20 day (nano CeO<sub>2</sub> as an internal standard).

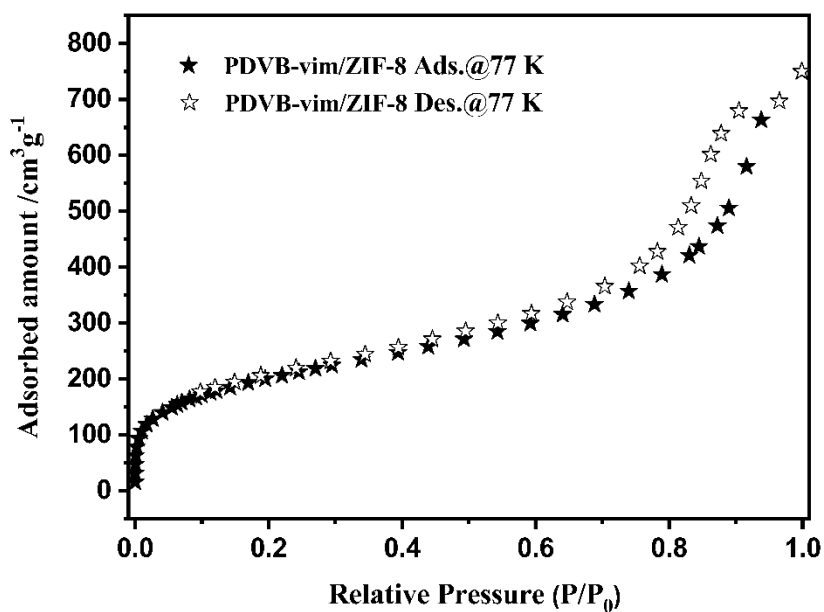

**Fig. S6** N<sub>2</sub> adsorption isotherm of ZIF-8/PDVB-vim composite after boiling water treatment.

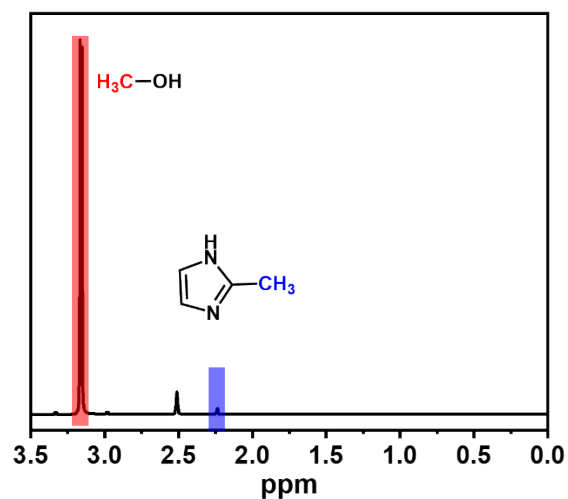

**Fig. S7** The  $^1\text{H}$  NMR of ZIF-8/PDVB-vim composite after immersed in boiling water for 24 h.

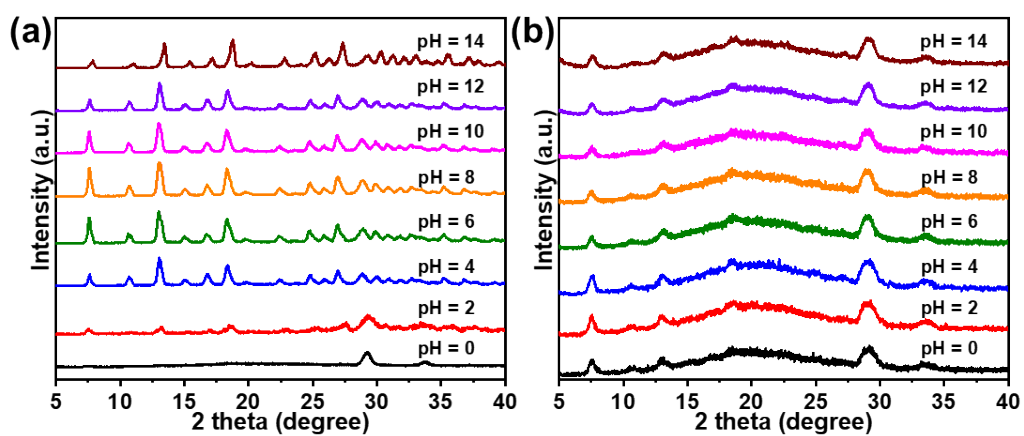

**Fig. S8** The pH durability of ZIF-8 and ZIF-8/PDVB-vim composite in a range of pH 0-14 (nano  $\text{CeO}_2$  as an internal standard).

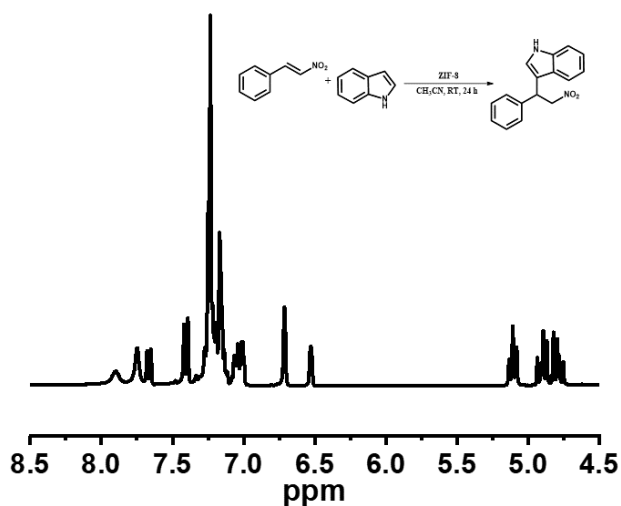

**Fig. S9** Example of integration in the  $^1\text{H}$  NMR spectrum for the determination of % conversion of the reaction product catalyzed by ZIF-8 (Table 1, Entry 1).

#### Calculation of the % conversion in the Friedel-Crafts reaction

The  $\alpha$ -vinyl and  $\beta$ -vinyl proton of *trans*- $\beta$ -nitrostyrene (reactant) appears at  $\delta$  8.01-8.06 ppm and the aliphatic proton of the product 3-(2-nitro-1-phenylethyl)-1H-indole appears at  $\delta$  4.5-5.3 ppm. Total amount of complex: unreacted *trans*- $\beta$ -nitrostyrene + 3-(2-nitro-1-phenylethyl)-1H-indole = 1 + 3.24 = 4.24

Percentage of the unreacted *trans*- $\beta$ -nitrostyrene:  $(100/4.24)\% \approx 23.6\%$

Conversion of *trans*- $\beta$ -nitrostyrene = yield of 3-(2-nitro-1-phenylethyl)-1H-indole =  $(100-23.6)\% = 76.4\%$ .



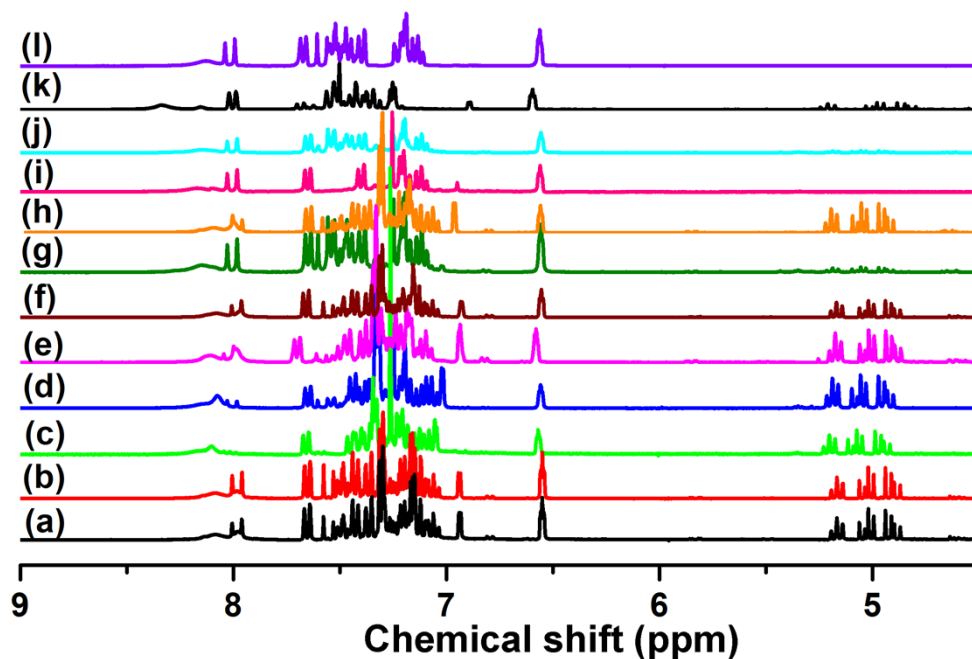

**Fig. S10**  $^1\text{H}$  NMR spectra monitoring the reaction between indole and *trans*- $\beta$ -nitrostyrene using different solvent or condition at 25 °C: (a) ZIF-8, MeCN,  $\text{N}_2$ ; (b) ZIF-8, MeCN, Air; (c) ZIF-8/PDVB-vim, MeCN,  $\text{N}_2$ ; (d) ZIF-8/PDVB-vim, MeCN, Air; (e) ZIF-8/PDVB-vim,  $\text{CH}_2\text{Cl}_2$ , air; (f) ZIF-8/PDVB-vim, THF, Air; (g) ZIF-8/PDVB-vim, MeOH, Air; (h) ZIF-8/PDVB-vim, toluene, Air; (i) no catalyst, MeCN, Air; (j) PDVB-vim, MeCN, Air; (k)  $\text{Zn}(\text{COO})_2 \cdot 2\text{H}_2\text{O}$ , MeCN, Air; (l) 2-Mim, MeCN, air.

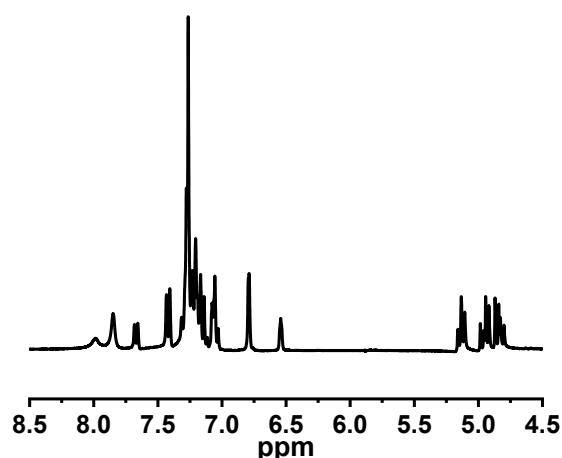

**Fig. S11**  $^1\text{H}$  NMR spectra monitoring the reaction between indole and *trans*- $\beta$ -nitrostyrene over mechanical-mixing composition of ZIF-8 crystals and PDVB-vim as catalyst.

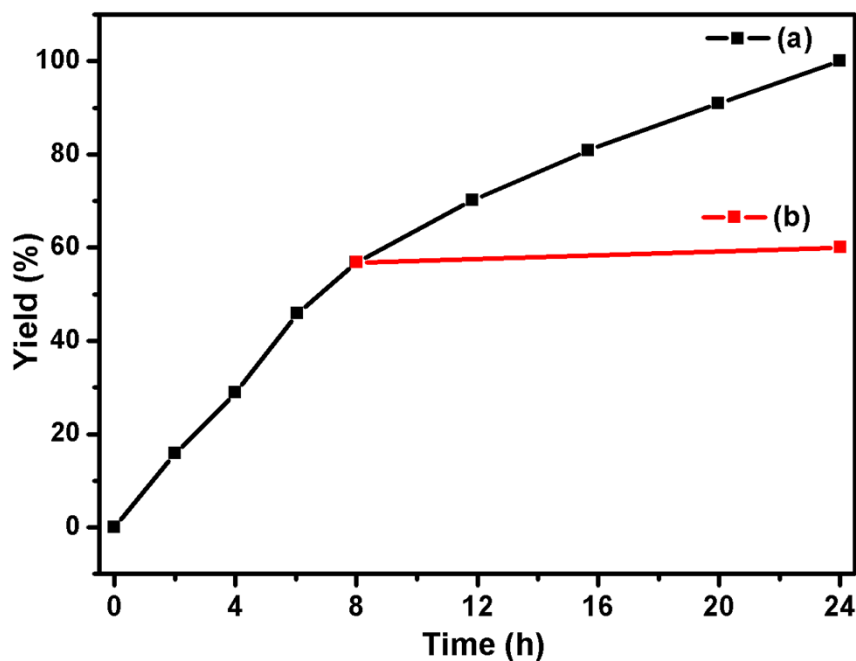

**Fig. S12** Time versus yield plot for the Friedel-Crafts alkylation reaction between indole and *trans*- $\beta$ -nitrostyrene (a) in the presence of ZIF-8/PDVB-vim composite and (b) upon filtration of ZIF-8/PDVB-vim solid after 8 h and the reaction mixture stirred without catalyst under identical conditions. Reaction conditions: *trans*- $\beta$ -nitrostyrene (1 mmol), indole (1.5 mmol), ZIF-8/PDVB-vim composite, room temperature.

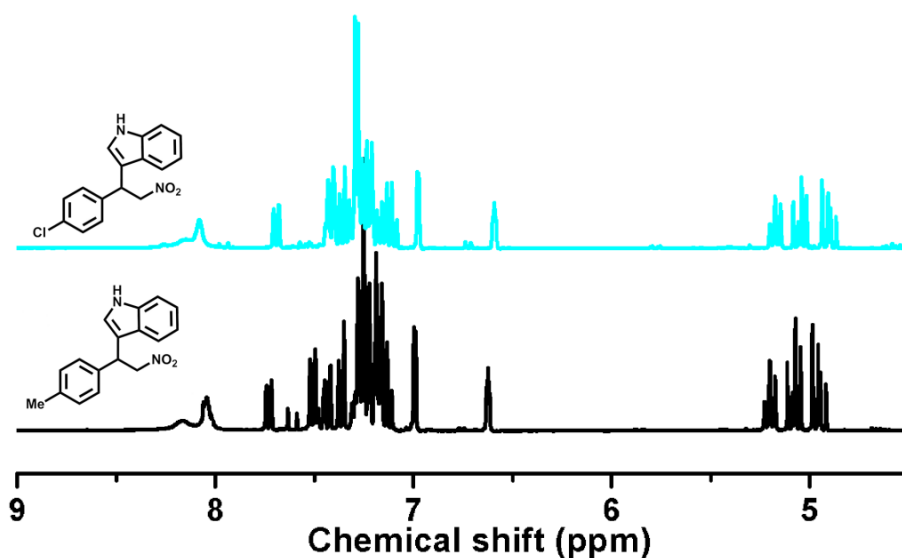

**Fig. S13**  $^1\text{H}$  NMR spectra for the substrate scope of *trans*- $\beta$ -nitrostyrene in Friedel-Crafts alkylation reaction catalysed by ZIF-8/PDVB-vim (Table 2, entries 1-2).

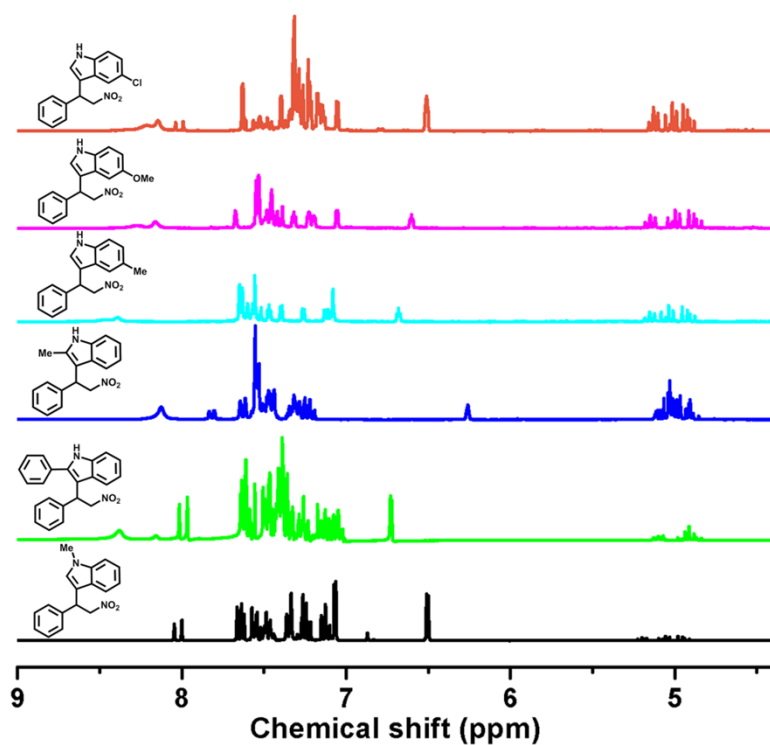

**Fig. S14**  $^1\text{H}$  NMR spectrums for the substrate scope of indole in the Friedel-Crafts alkylation reaction catalysed by ZIF-8/PDVB-vim (Table 2, entries 3-8).

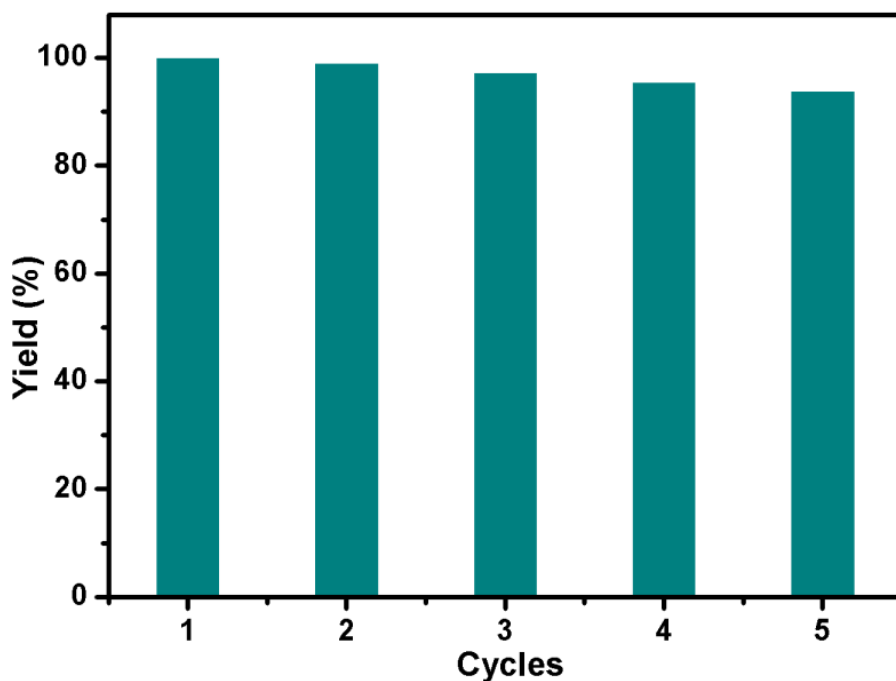

**Fig. S15** Reusability data for the Friedel-Crafts alkylation reaction between indole and *trans*- $\beta$ -nitrostyrene using ZIF-8/PDVB-vim composite as a heterogeneous solid catalyst.

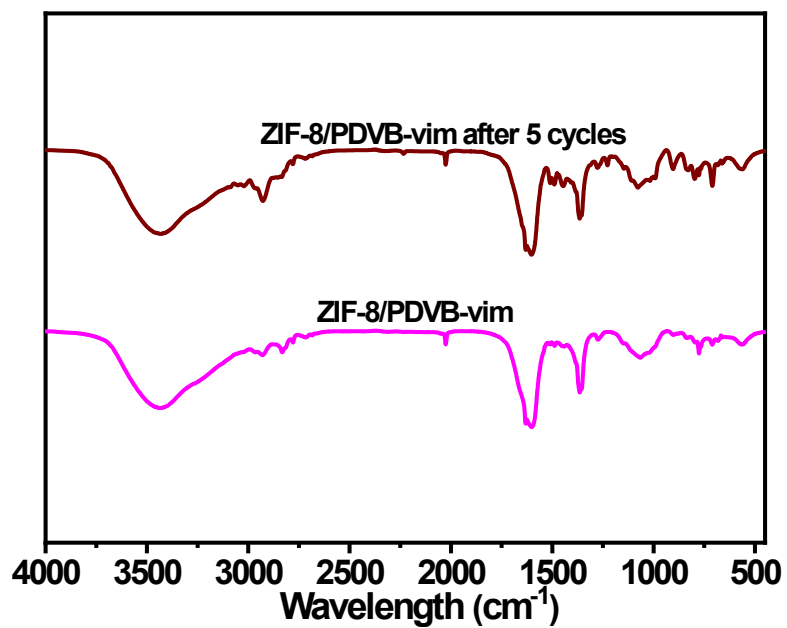

**Fig. S16** FT-IR spectrums of ZIF-8/PDVB-vim before and after 5 cycles of catalytic experiments.

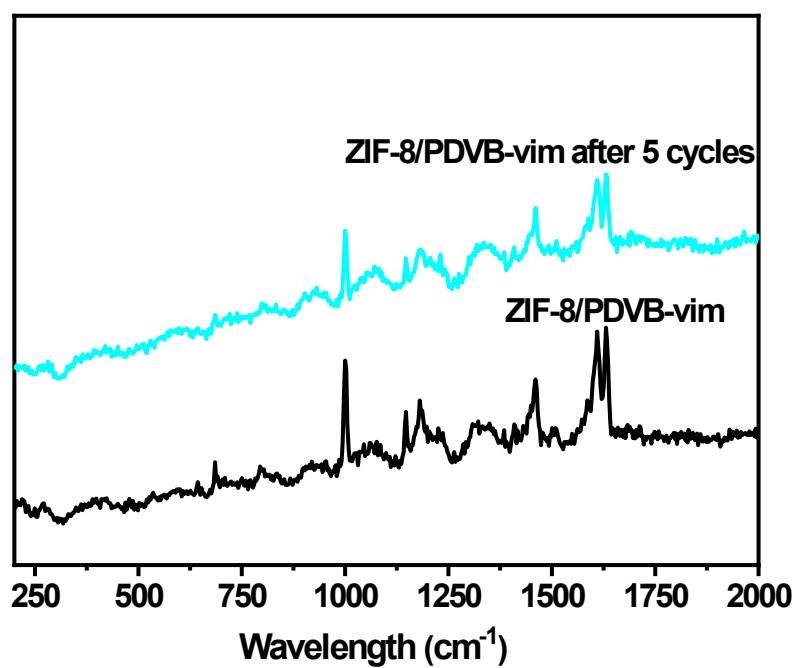

**Fig. S17** Raman spectrums of ZIF-8/PDVB-vim before after 5 cycles of catalytic experiments.

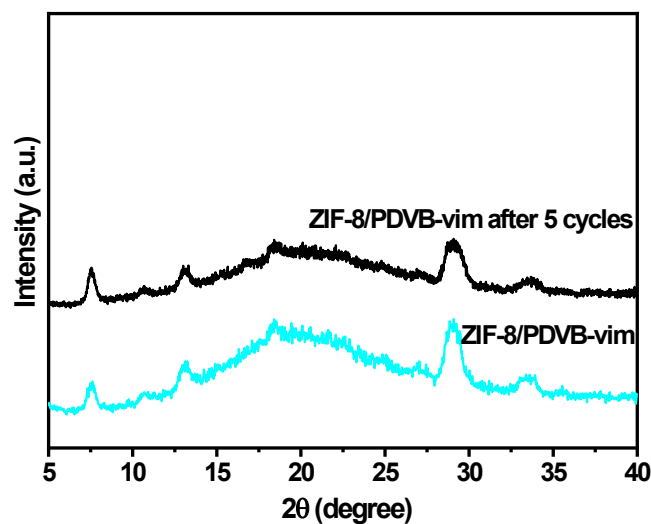

**Fig. S18** The PXRD patterns of ZIF-8/PDVB-vim before after 5 cycles of catalytic experiments (nano CeO<sub>2</sub> as an internal standard).

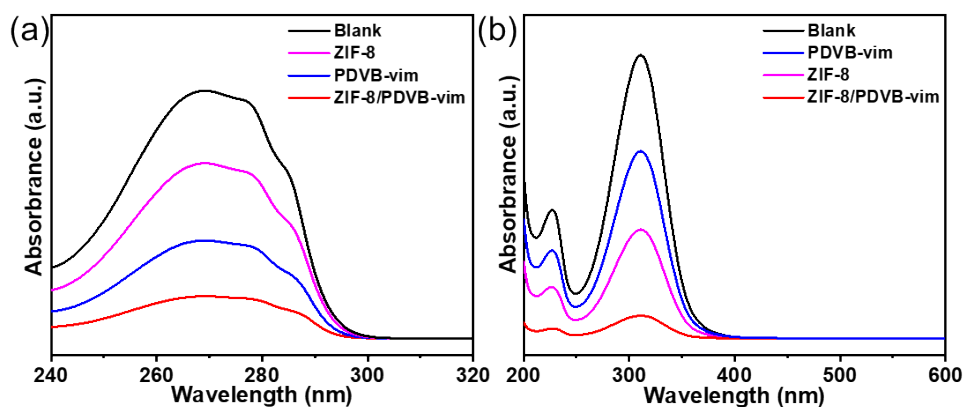

**Fig. S19** The adsorption experiments of ZIF-8, PDVB-vim and ZIF-8/PDVB-vim for indole/trans- $\beta$ -nitrostyrene in MeCN solution.

**Table S1** The amount of Zn species loaded into ZIF-8/PDVB-vim based on ICP-AES results.

| Entry          | Catalyst       | wt %  |
|----------------|----------------|-------|
| 1 <sup>a</sup> | ZIF-8/PDVB-vim | 4.579 |
| 2 <sup>b</sup> | ZIF-8/PDVB-vim | 4.576 |
| 3 <sup>c</sup> | ZIF-8/PDVB-vim | 4.571 |

<sup>a</sup> the as- prepared ZIF-8/PDVB-vim sample; <sup>b</sup> the ZIF-8/PDVB-vim after boiling water treatment; <sup>c</sup> the ZIF-8/PDVB-vim after reaction.

**Table S2** The lower catalyst loading for catalyzing trans- $\beta$ -nitrostyrene and indoles in the Friedel-Crafts Reaction.

| Entry | Catalyst       | Atmosphere     | Yield (%) |
|-------|----------------|----------------|-----------|
| 1     | ZIF-8/PDVB-vim | N <sub>2</sub> | 52.6      |
| 2     | ZIF-8/PDVB-vim | Air            | 51.0      |

Trans- $\beta$ -nitrostyrene (150 mg, 1.0 mmol), Indoles (180 mg, 1.5 mmol), catalyst 2 mol% based on Zn(II) center, MeCN 5 mL, under N<sub>2</sub> or Air atmosphere at 25 °C for 24 h.

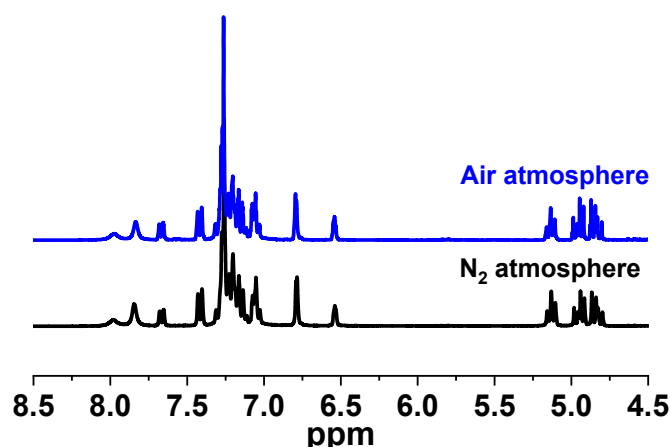

Due to all the yield of the product is >99% in humid air and dry N<sub>2</sub> over ZIF-8/PDVB-vim catalyst, the catalyst might reach the full conversion in both instances. So, the lower catalyst loading was used to distinguish the effect of water. The yields of product in ZIF-8/PDVB-vim were similar no matter whether in humid air and dry N<sub>2</sub>. Yet, the results of ZIF-8 were distinguishing (Table 1, entry 1 and 2 in text). These results imply the superiority of the material design strategy.

**Table S3** Comparison of Various MOF Catalysts in the Friedel-Crafts Reaction of Indole and trans- $\beta$ -nitrostyrene.

| Entry | Catalyst                                                               | Mol (%) | Time (h) | Solvent                         | Temp (°C) | Yield (%) | Ref. |
|-------|------------------------------------------------------------------------|---------|----------|---------------------------------|-----------|-----------|------|
| 1     | Zr-UiO-67                                                              | 10      | 24       | CH <sub>2</sub> Cl <sub>2</sub> | 25        | 22        | S3   |
| 2     | Zr-UiO-67-Urea                                                         | 3.8     | 24       | toluene                         | 70        | 97        | S4   |
| 3     | Uio-67-Squar/bpdc                                                      | 10      | 24       | CD <sub>2</sub> Cl <sub>2</sub> | RT        | 78        | S4   |
| 4     | Cr-MIL-101                                                             | 15      | 48       | CH <sub>3</sub> CN              | 60        | 22        | S5   |
| 5     | Cr-MIL-101-UR3                                                         | 15      | 24       | CH <sub>3</sub> CN              | 60        | 93        | S5   |
| 6     | [CuL <sub>1</sub> ·H <sub>2</sub> O].2DMF                              | 1.5     | 18       | CH <sub>3</sub> CN              | 60        | 98        | S6   |
| 7     | Zn <sub>4</sub> O(L <sub>2</sub> )(DMF) <sub>2</sub>                   | 22      | 24       | Toluene                         | 60        | 90        | S7   |
| 8     | Cu <sub>4</sub> (dbda) <sub>2</sub> ·(CH <sub>3</sub> OH) <sub>4</sub> | 5       | 24       | CHCl <sub>3</sub>               | 50        | 99        | S4   |
| 9     | Zn <sub>2</sub> (2-BQBG)(BDC) <sub>2</sub>                             | 3       | 24       | CH <sub>2</sub> Cl <sub>2</sub> | 27        | 83        | S8   |
| 10    | Cu <sub>3</sub> (BTC) <sub>2</sub>                                     | 16.5    | 24       | toluene                         | 50        | 98        | S9   |

## References

- S1.** Venna S. R.; Jasinski J. B.; Carreon M. A. Structural Evolution of Zeolitic Imidazolate Framework-8. *J. Am. Chem. Soc.* **2010**, *132*, 18030-18033.
- S2.** Liu F.; Wang L.; Sun Q.; Zhu L.; Meng X.; Xiao F. S. Transesterification Catalyzed by Ionic Liquids on Superhydrophobic Mesoporous Polymers: Heterogeneous Catalysts That Are Faster than Homogeneous Catalysts. *J. Am. Chem. Soc.* **2012**, *134* (41), 16948-16950.
- S3.** McGuirk, C. M.; Katz, M. J.; Stern, C. L.; Sarjeant, A. A.; Hupp, J. T.; Farha, O. K.; Mirkin, C. A. Turning On Catalysis: Incorporation of a Hydrogen-Bond-Donating Squaramide Moiety into a Zr Metal-Organic Framework. *J. Am. Chem. Soc.* **2015**, *137* (2), 919-925.
- S4.** Dong, X. W.; Liu, T.; Hu, Y. Z.; Liu, X. Y.; Che, C. M. Urea postmodified in a metal-organic framework as a catalytically active hydrogen-bond-donating heterogeneous catalyst. *Chem. Commun.* **2013**, *49*, 7681-7683.
- S5.** Zhu, C.; Mao, Q.; Li, D.; Li, C.; Zhou, Y.; Wu, X.; Luo, Y.; Li, Y. A readily available urea based MOF that act as a highly active heterogeneous catalyst for Friedel-Crafts reaction of indoles and nitrostryenes. *Catal. Commun.* **2018**, *104*, 123-127.
- S6.** Zhang, X.; Zhang, Z.; Boissonnault, J.; Cohen, S. M. Design and synthesis of squaramide-based MOFs as efficient MOF-supported hydrogen-bonding organocatalysts. *Chem. Commun.* **2016**, *52*, 8585-8588.
- S7.** Rao, P. C.; Mandal, S. Friedel-Crafts Alkylation of Indoles with Nitroalkenes through Hydrogen-Bond-Donating Metal-Organic Framework. *ChemCatChem* **2017**, *9*, 1172-1176.
- S8.** Markad, D.; Mandal, S. K. Design of a Primary-Amide-Functionalized Highly Efficient and Recyclable Hydrogen-Bond-Donating Heterogeneous Catalyst for the Friedel-Crafts Alkylation of Indoles with  $\beta$ -Nitrostyrenes. *ACS Catal.* **2019**, *9*, 3165-3173.

**S9.** Nagaraj, A.; Amarajothi, D.  $\text{Cu}_3(\text{BTC})_2$  as a viable heterogeneous solid catalyst for Friedel-Crafts alkylation of indoles with nitroalkenes. *J. Colloid. Interf. Sci.* **2017**, *494*, 282-289.
